# Supplementary material
Source: PubMed Central journal article supplement (PMC7732359)
Supplement: NIHMS1621658-supplement-SI.pdf [file NIHMS1621658-supplement-SI.pdf]

**Supporting Information:**

**Human  $\gamma$ S-crystallin copper binding helps  
buffer against aggregation caused by oxidative  
damage**

Kyle W. Roskamp,<sup>‡</sup> Sana Azim,<sup>§</sup> Günther Kassier,<sup>§</sup> Brenna-Norton Baker,<sup>‡,§</sup> Marc  
A. Sprague-Piercy,<sup>||</sup> R. J. Dwyane Miller,<sup>§,⊥</sup> and Rachel W. Martin<sup>\*,‡,||</sup>

<sup>‡</sup>*Department of Chemistry, University of California, Irvine, CA 92697-2025, USA*

<sup>§</sup>*Max Planck Institute for the Structure and Dynamics of Matter, Center for Free Electron  
Laser Science, Luruper Chaussee 149, 22761, Hamburg, Germany.*

<sup>||</sup>*Department of Molecular Biology and Biochemistry, University of California, Irvine, CA  
92697-3900, USA*

<sup>⊥</sup>*Department of Chemistry, University of Toronto, Toronto, M5S 3H6, Canada*

E-mail: [rwmartin@uci.edu](mailto:rwmartin@uci.edu)

## Running header

Supporting Information:

Human  $\gamma$ S-crystallin copper binding helps buffer against aggregation caused by oxidative  
damage

## Table of Contents

### Figures:

- Histograms of  $\gamma$ S-crystallin aggregate size from TEM (S1);
- TEM of UV irradiated  $\gamma$ S-WT at variable concentrations (S2);
- TEM of UV irradiated  $\gamma$ S-WT over time (S3);
- TEM of UV irradiated and native  $\gamma$ S-crystallin variant aggregate (S4);
- FTIR spectra of aggregated  $\gamma$ S-crystallins (S5)
- Cu<sup>+</sup> binding sites for  $\gamma$ S-WT predicted using MIB (S6);
- SEC of  $\gamma$ S-WT and  $\gamma$ S-C<sub>0</sub> species after CuCl<sub>2</sub> treatment (S7);
- SDS-PAGE of  $\gamma$ S-crystallin treated with CuCl<sub>2</sub> (S8);
- SDS-PAGE analysis of  $\gamma$ S-WT stored for 5 months (S9);
- SDS-PAGE analysis of chelating agent-treated  $\gamma$ S-crystallin aggregates (S10);
- MS/MS fragmentation of intramolecular disulfide bonded fragments (S11);
- Mass spectra of fragments containing an intramolecular disulfide (S12);
- Mass spectrometry data for SEC-separated dimer peaks (S13)

### Tables:

- MS-MS fragmentation of disulfide bonded YDCDCDCADFHTY and LSSCR peptides (S1);
- Cysteine content of human  $\alpha$ -,  $\beta$ -, and  $\gamma$ -crystallins (S2)



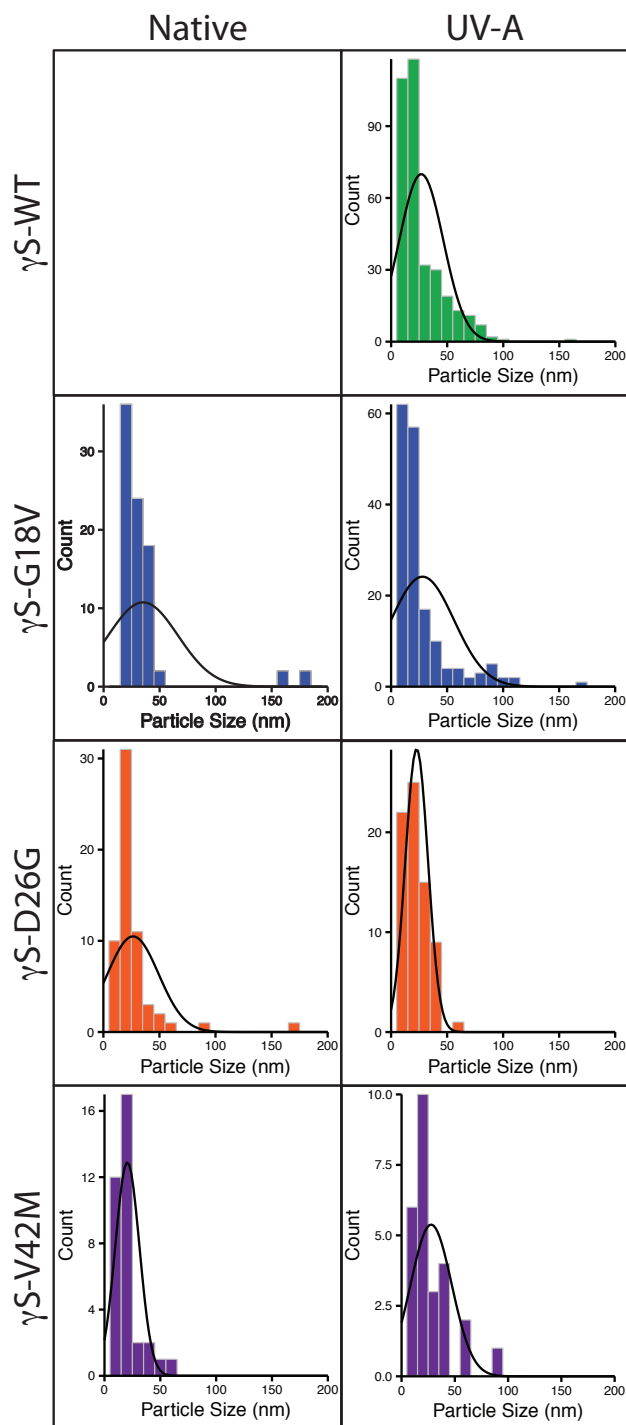

Figure S1: Size distribution histograms for aggregates of  $\gamma$ S-crystallin point variants allowed to form without external provocation (left) and those formed through UV-A photodamage (right).

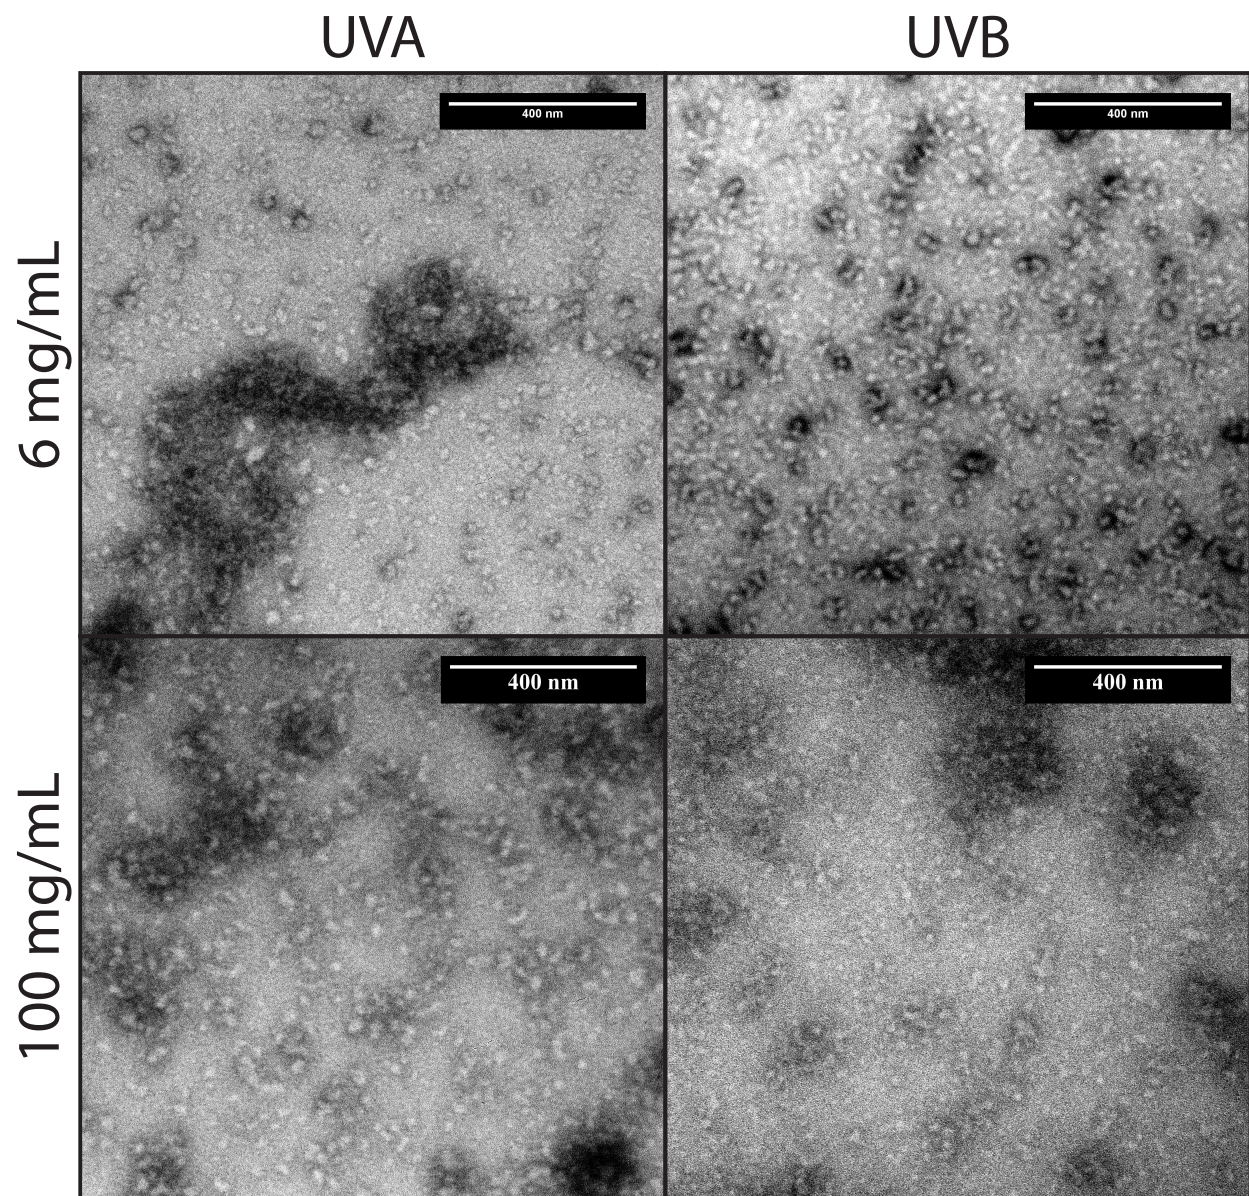

Figure S2: Irradiation of  $\gamma$ S-WT from UVA ( $1.6 \text{ kJ/cm}^2$ ) and UVB ( $104.4 \text{ J/cm}^2$ ) produces aggregates with similar morphology independent of sample concentration during irradiation.



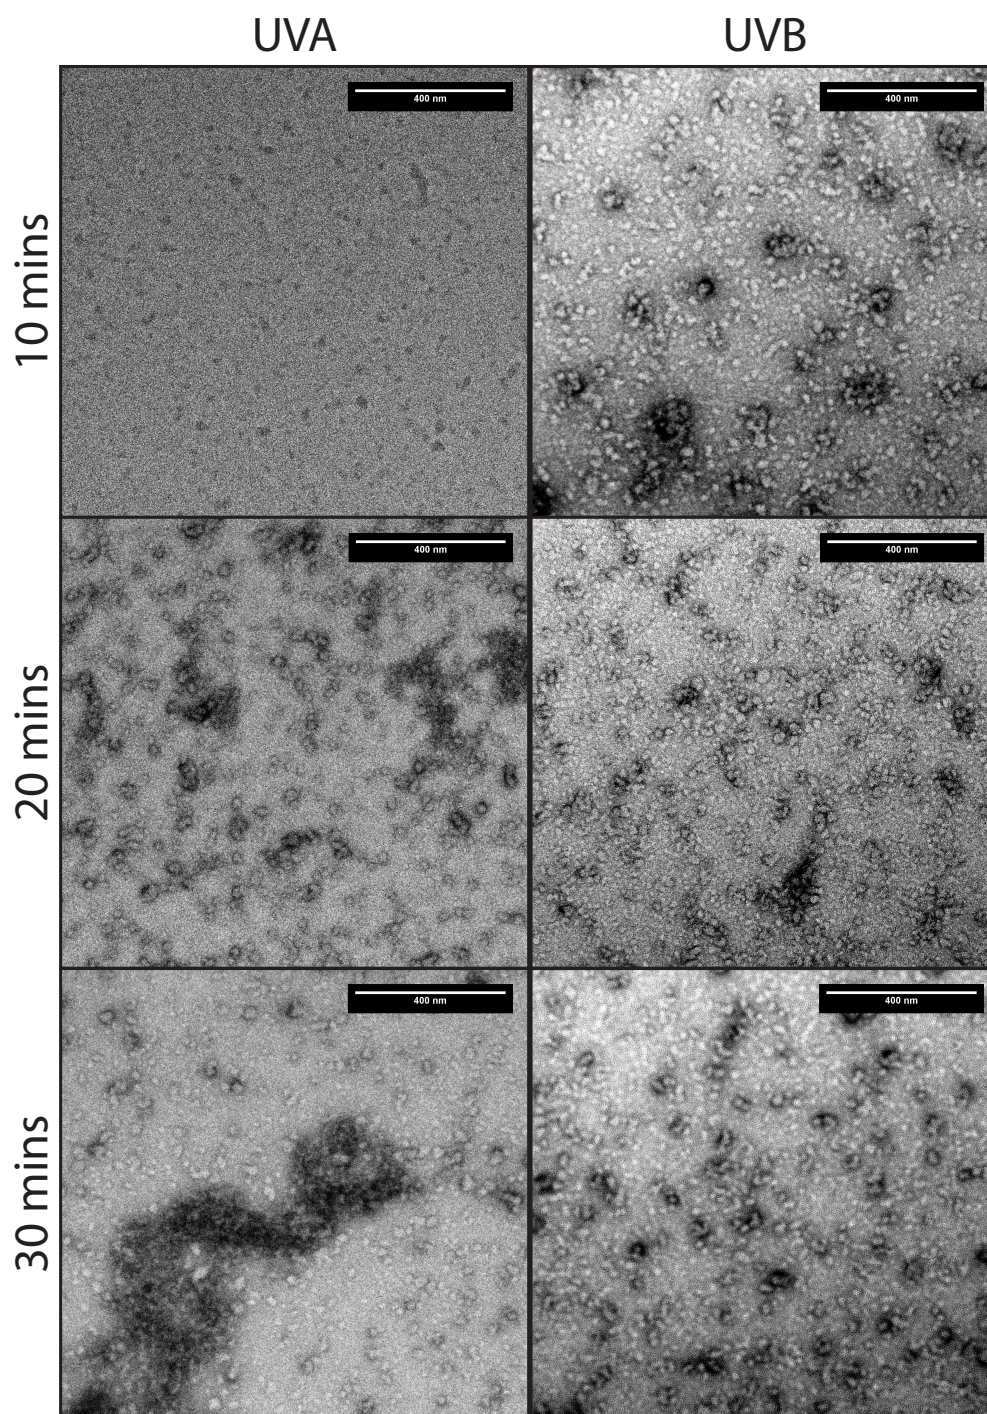

Figure S3: TEM images of aggregates formed from  $\gamma$ S-WT after irradiation using UVA or UVB radiation for 10 (0.5 kJ/cm<sup>2</sup>, 34.8 J/cm<sup>2</sup>), 20 (1.1 kJ/cm<sup>2</sup>, 69.6 J/cm<sup>2</sup>), and 30 minutes (1.6 kJ/cm<sup>2</sup>, 104.4 J/cm<sup>2</sup>). Under both treatments, globular aggregates form and these particles associate, yielding larger aggregates.



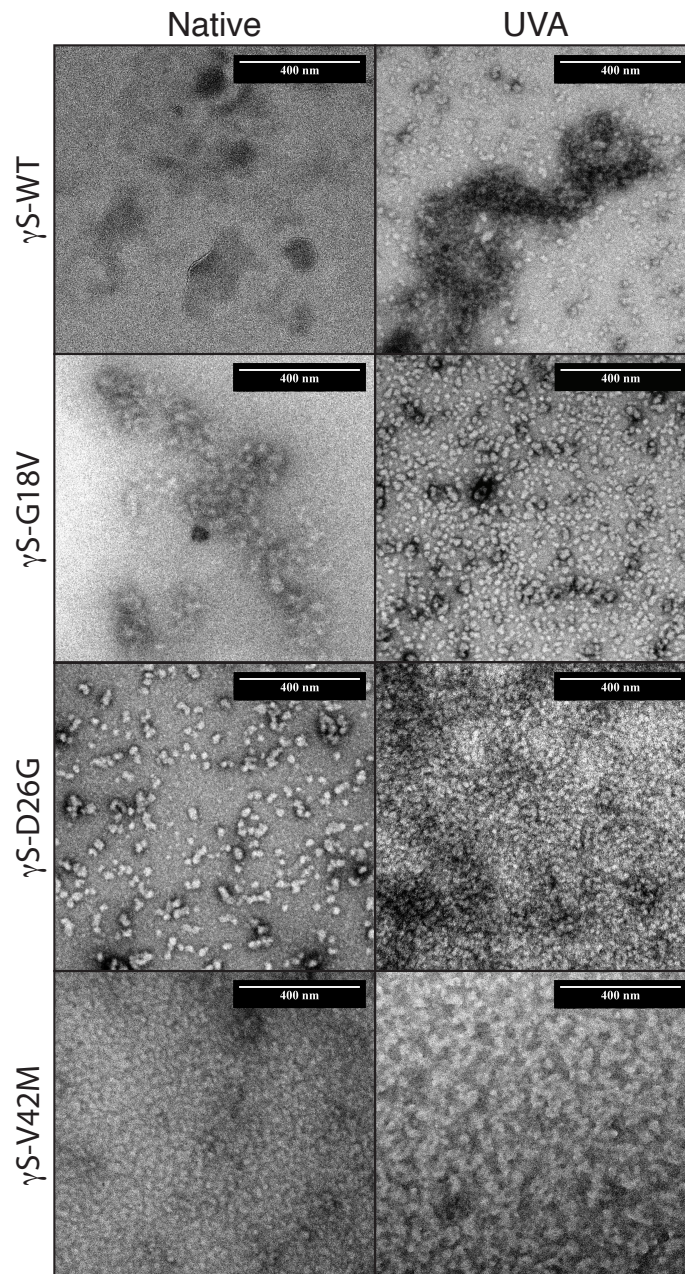

Figure S4: The first panel shows undamaged WT  $\gamma$ S-crySTALLIN at the same concentration as for the variants shown in the other images. No aggregates are formed under these conditions. The other panels show TEM images of  $\gamma$ S-crySTALLIN aggregates formed either by allowing the sample to precipitate over time as described in the Methods section of the main text, or by irradiation with UVA. Native aggregates from cataract-related point variants are very similar in size and morphology to those formed via UVA photodamage.

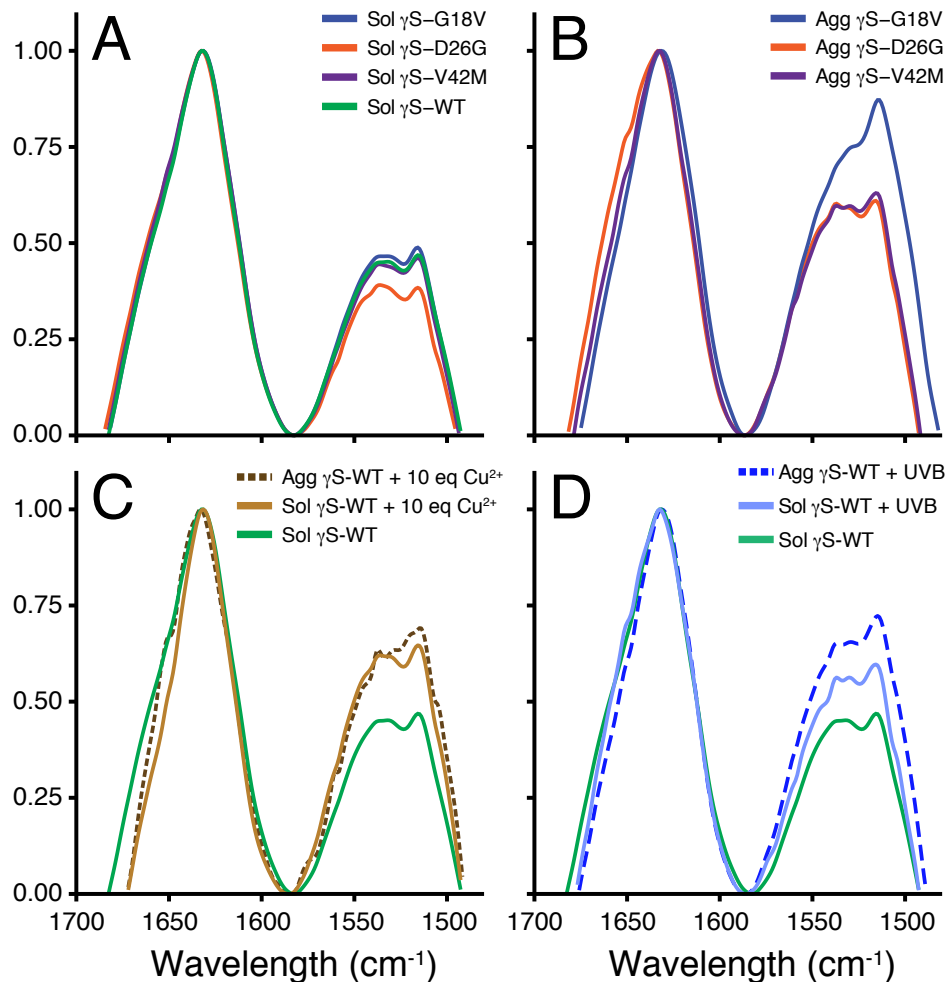

Figure S5: FTIR spectra of aggregated  $\gamma$ S-crystallins. (A) FTIR of soluble  $\gamma$ S-WT and tested point variants exhibit identical spectra. (B) Native aggregates of  $\gamma$ S point variants exhibit minor broadening of the amide I peak and slightly elevated amide II/I peak intensity ratios. (C) Soluble and aggregated  $\gamma$ S-WT resulting from CuCl<sub>2</sub> treatment show minor narrowing of the amide I peak. As is observed for the  $\gamma$ S-crystallin point variants, the amide II/I peak intensity ratio is increased. (D) UVB treatment of  $\gamma$ S-WT induced similar changes to CuCl<sub>2</sub> treatment for soluble and insoluble species.

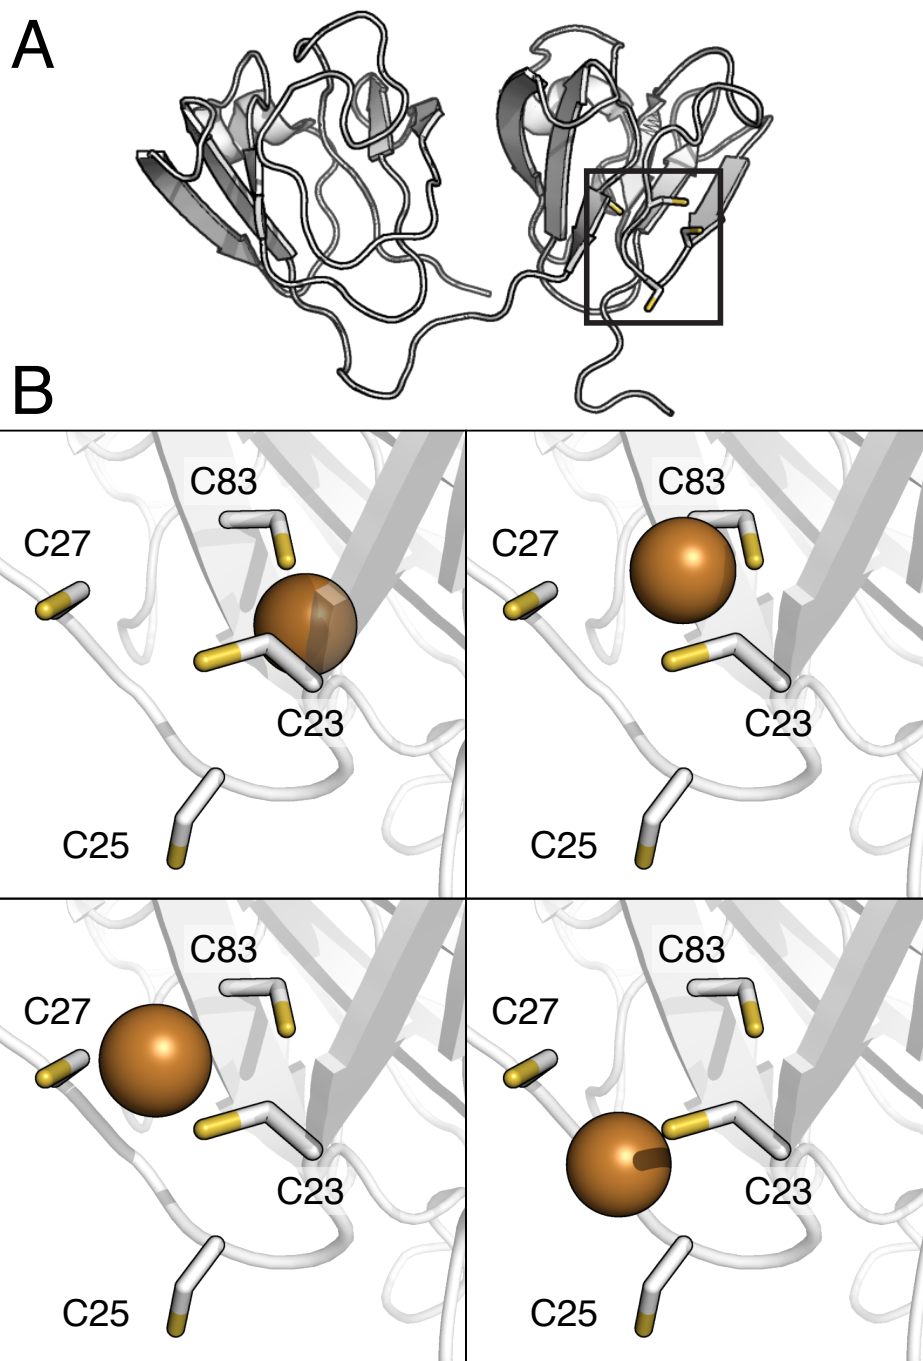

Figure S6: (A) Structure of human  $\gamma$ S-crystallin (PDBID: 2M3T<sup>1</sup>), with the location of the cysteine loop indicated by an open rectangle. (B) Predicted  $\text{Cu}^+$  binding sites for  $\gamma$ S-crystallin generated via the MIB webserver (<http://bioinfo.cmu.edu.tw/MIB/>).<sup>2,3</sup> Binding predictions implicated some or all of C23, C25, C27, and C83 in the majority of the results.

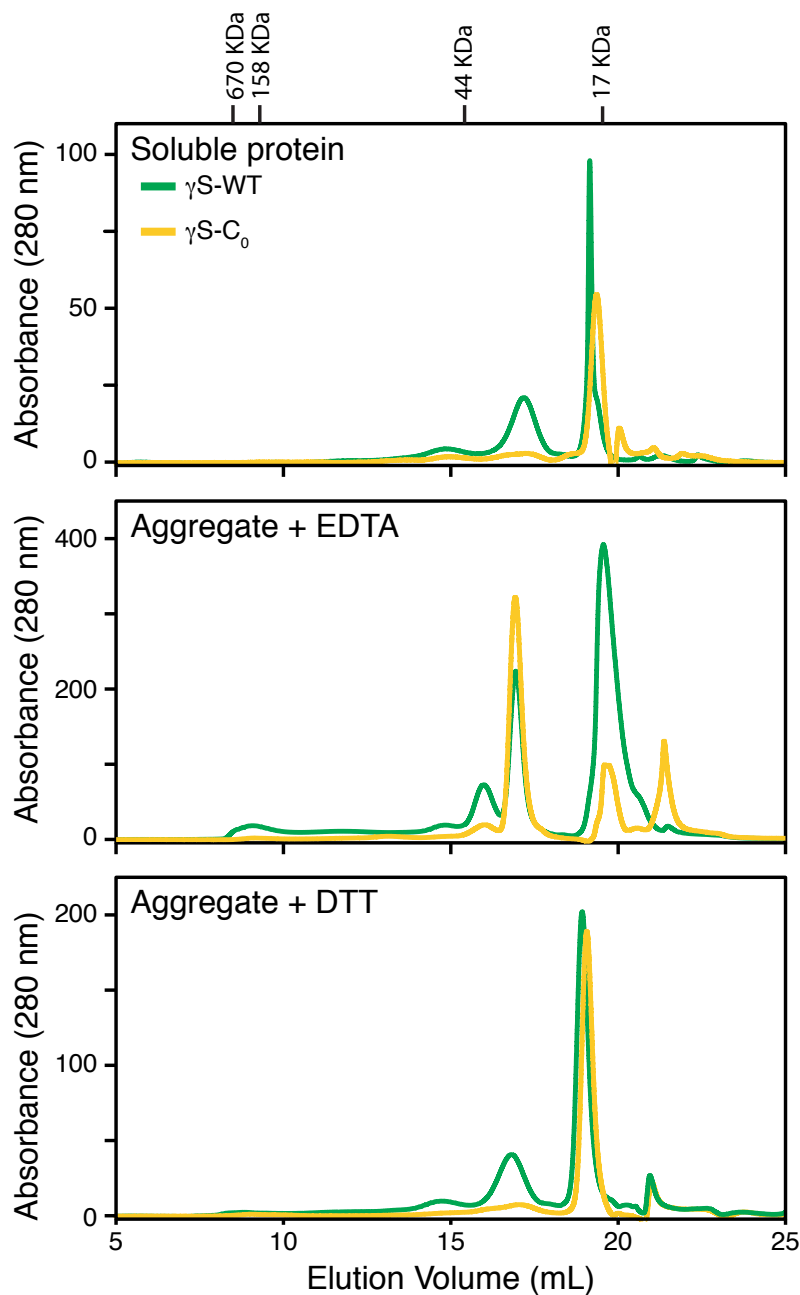

Figure S7: Analytical SEC measurements for  $\gamma$ S-WT and  $\gamma$ S-C<sub>0</sub> collected separately following  $\text{Cu}^{2+}$  treatment. The soluble sample (top panel) was collected as the supernatant following treatment. The aggregates that were resuspended during the subsequent EDTA treatment were then collected (middle panel). Finally, the remaining aggregates were treated with DTT, with the resulting resuspension collection as the final samples. (bottom panel). Prior to loading onto the SEC, each sample was treated with EDTA and DTT in order to minimize potential damage to the column. The distribution of protein species for  $\gamma$ S-WT is similar across the three chromatograms. Monomers compose the bulk of the elutants while a dimer peak is also clearly observable. In contrast to  $\gamma$ S-WT, in  $\gamma$ S-C<sub>0</sub>, monomeric species are almost exclusively present in the remaining soluble and DTT-resolubilized chromatograms. The EDTA-resolubilized chromatogram of  $\gamma$ S-C<sub>0</sub> is primarily dimeric with a low level of monomer present.

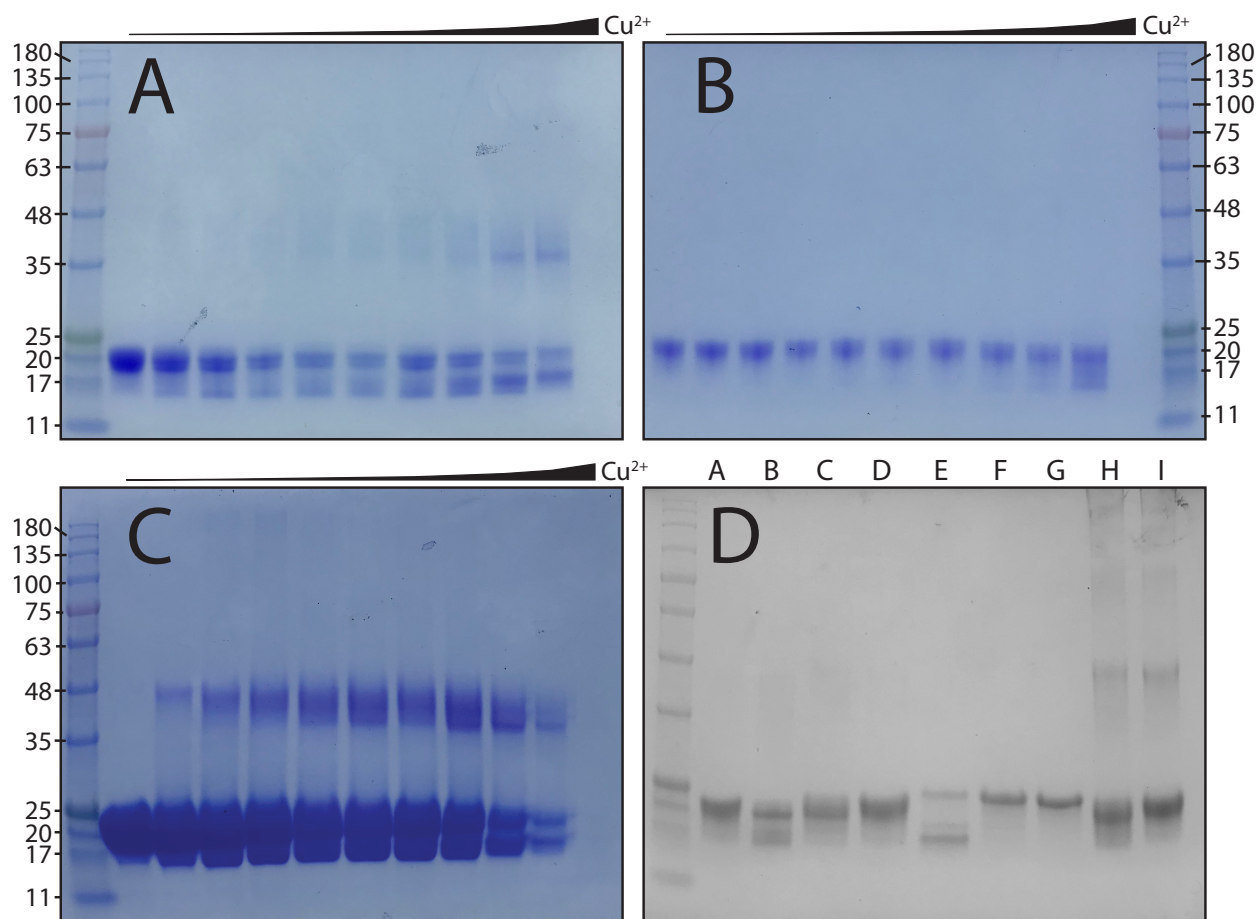

Figure S8: SDS-PAGE separation of  $\gamma$ S-crystallin species after treatment with  $\text{CuCl}_2$ . The gradient (left to right) used for all gels was 0, 0.1, 0.2, 0.4, 0.6, 0.8, 1, 1.5, 2, 3, and 5 equivalents of  $\text{CuCl}_2$ . The lanes of gels A and B were loaded with equal concentrations and volumes of protein, with the exception of the 5 equivalents lane, for which only trace amounts of protein remained soluble. For gel C the samples were prepared with equal volumes of the remaining soluble protein such that the observed loss of protein is representative of the increased insoluble fraction. (**Gel A**) Soluble  $\gamma$ S-WT after incubation with increasing levels of  $\text{CuCl}_2$ . (**Gel B**) Soluble  $\gamma$ S-WT after incubation with increasing levels of  $\text{CuCl}_2$  and reduction subsequent reduction with BME. (**Gel C**) Soluble  $\gamma$ S-WT after incubation with increasing levels of  $\text{CuCl}_2$ . (**Gel D**) A:  $\gamma$ S-WT, B-D:  $\gamma$ S-WT treated 1 equiv  $\text{CuCl}_2$  alone (B), with EDTA (C), with EDTA and BME (D), E-G:  $\gamma$ S- $\text{C}_0$  treated 1 equiv  $\text{CuCl}_2$  alone (E), with EDTA (F), or with EDTA and BME (G), H: soluble UV-B treated  $\gamma$ S, I: soluble UV-B treated  $\gamma$ S with BME.



DTT (5 equvi)    -        +        -        +

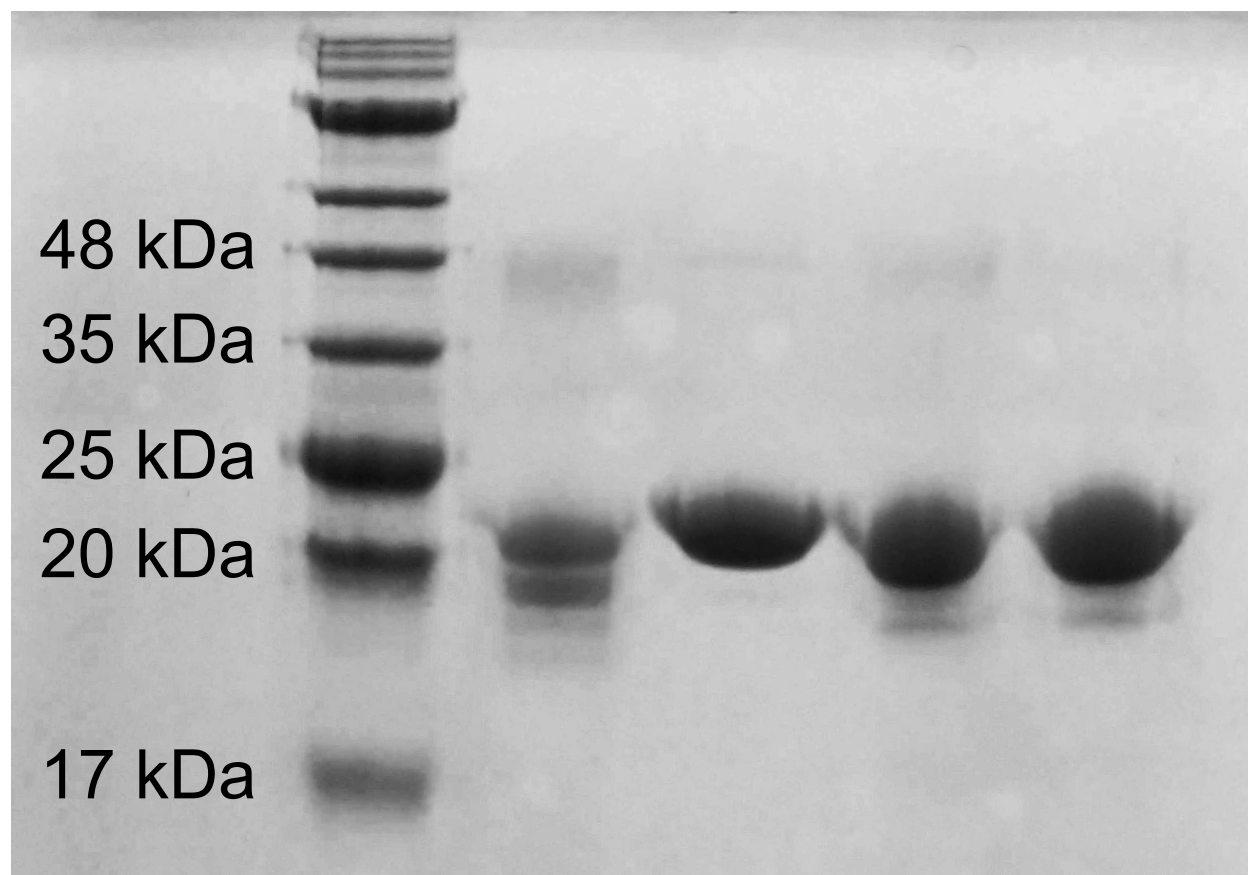

Figure S9: SDS-PAGE analysis of  $\gamma$ S-WT stored for 5 months. Two independent samples were stored at 10 mg/mL in the absence of reducing agent at 4 °C for 5 months. Prior to electrophoresis, lanes 2 and 4 were treated with 5 equivalents of DTT. The first two lanes show that the intramolecular disulfide bonds formed are completely reducible, whereas the intramolecular disulfide formed in lane 3 shows negligible reduction following DTT treatment (lane 4). In both cases, the low levels of dimeric species observed are eliminated following reduction.

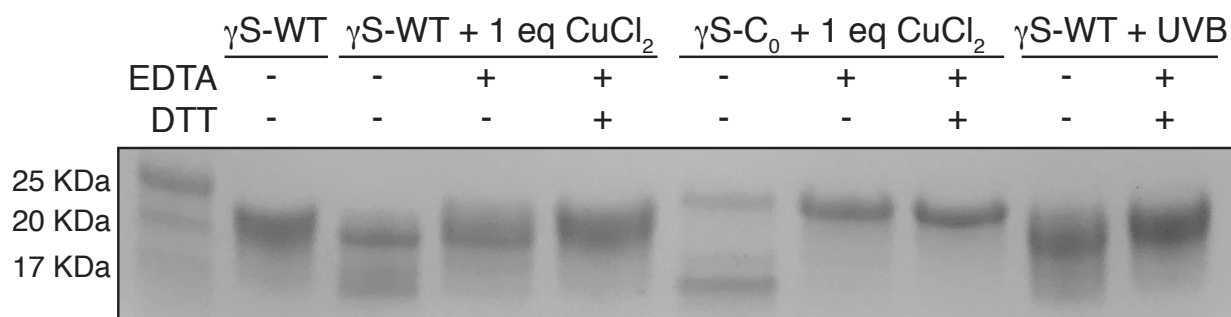

Figure S10: SDS-PAGE analysis of chelating agent-treated  $\gamma$ S-crystallin aggregates. Lanes are labeled from left to right, following the laddered. Lane 1:  $\gamma$ S-WT, Lane 2:  $\gamma$ S-WT treated 1 equiv CuCl<sub>2</sub> alone, Lane 3: sample 2 with EDTA, Lane 4: sample 2 with EDTA and BME, Lane 5:  $\gamma$ S-C<sub>0</sub> treated 1 equiv CuCl<sub>2</sub>, Lane 6: sample 5 with EDTA, Lane 7: sample 5 with EDTA and BME, Lane 8: soluble UV-B-treated  $\gamma$ S-WT, Lane 9: sample 7 with BME.

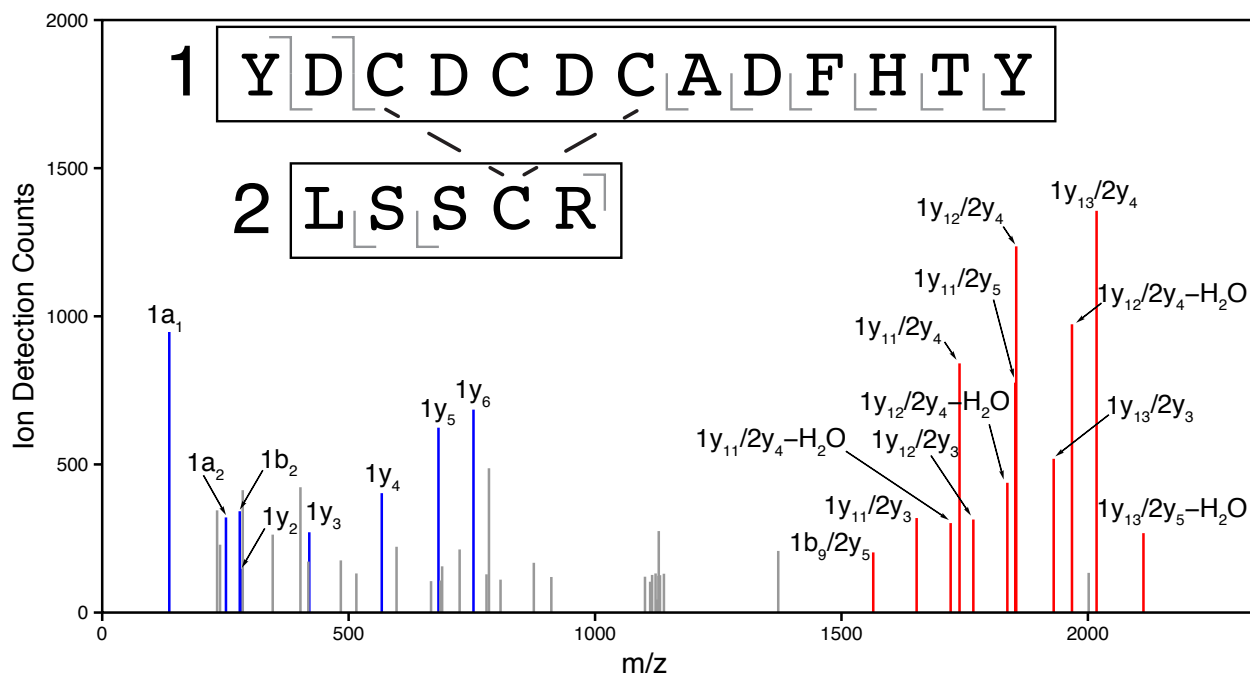

Figure S11: The observed secondary fragmentation observed for the YDCDCDCADFHTY/LSSCR peptides containing an intramolecular disulfide bond. Fragments containing the intramolecular disulfide bond are colored red, while fragments of only one of the peptides are colored blue. The first peptide, YDCDCDCADFHTY, and second peptide, LSSCR, are indicated by the numbers ‘1’ and ‘2’, respectively. A slash between fragments indicates an intramolecular disulfide bond. The observed masses for each fragment are listed in Table S1.

Table S1: MS-MS fragmentation of disulfide-bonded YDCDCDCADFHTY and LSSCR peptides

| Peptide                                | Assignment                                          | Fragment Mass (Da) | Control Peak Mass (Da) | Intensity (counts) |
|----------------------------------------|-----------------------------------------------------|--------------------|------------------------|--------------------|
| YDCDCDCADFHTY/LSSCR                    | 1y <sub>13</sub> /2y <sub>5</sub>                   | 2130.7302          | 2130.7053              | 9900               |
| YDCDCDCADFHTY/LSSCR - H <sub>2</sub> O | 1y <sub>13</sub> /2y <sub>5</sub> -H <sub>2</sub> O | 2112.7197          | 2112.6934              | 268                |
| YDCDCDCADFHTY/SSCR                     | 1y <sub>13</sub> /2y <sub>4</sub>                   | 2017.6461          | 2017.6318              | 1356               |
| DCDCDCADFHTY/SSCR                      | 1y <sub>12</sub> /2y <sub>4</sub> -H <sub>2</sub> O | 1967.6669          | 1967.6307              | 973                |
| YDCDCDCADFHTY/SCR                      | 1y <sub>13</sub> /2y <sub>3</sub>                   | 1930.6141          | 1930.5786              | 519                |
| DCDCDCADFHTY/SSCR                      | 1y <sub>12</sub> /2y <sub>4</sub>                   | 1854.5828          | 1854.5564              | 1236               |
| CDCDCADFHTY/LSSCR                      | 1y <sub>11</sub> /2y <sub>5</sub>                   | 1852.6399          | 1852.6012              | 776                |
| DCDCDCADFHTY/SSCR                      | 1y <sub>12</sub> /2y <sub>4</sub> -H <sub>2</sub> O | 1836.5723          | 1836.5405              | 438                |
| DCDCDCADFHTY/SCR                       | 1y <sub>12</sub> /2y <sub>3</sub>                   | 1767.5508          | 1767.5309              | 314                |
| CDCDCADFHTY/SSCR                       | 1y <sub>11</sub> /2y <sub>4</sub>                   | 1739.5558          | 1739.5308              | 841                |
| CDCDCADFHTY/SSCR - H <sub>2</sub> O    | 1y <sub>11</sub> /2y <sub>4</sub> -H <sub>2</sub> O | 1721.5453          | 1721.5142              | 302                |
| CDCDCADFHTY/SCR                        | 1y <sub>11</sub> /2y <sub>3</sub>                   | 1652.5238          | 1652.4958              | 319                |
| ADFHTY                                 | 1y <sub>6</sub>                                     | 753.3207           | 753.3135               | 685                |
| DFHTY                                  | 1y <sub>5</sub>                                     | 682.2836           | 682.2804               | 624                |
| FHTY                                   | 1y <sub>4</sub>                                     | 567.2567           | 567.2583               | 403                |
| H <sub>2</sub> TY                      | 1y <sub>3</sub>                                     | 420.1883           | 420.1905               | 271                |
| TY                                     | 1y <sub>2</sub>                                     | 283.1294           | 283.1385               | 148                |
| YD                                     | 1b <sub>2</sub>                                     | 279.0981           | 279.1046               | 342                |
| YD                                     | 1a <sub>2</sub>                                     | 251.1032           | 251.1118               | 321                |
| Y                                      | 1a <sub>1</sub>                                     | 136.0762           | 136.0835               | 947                |

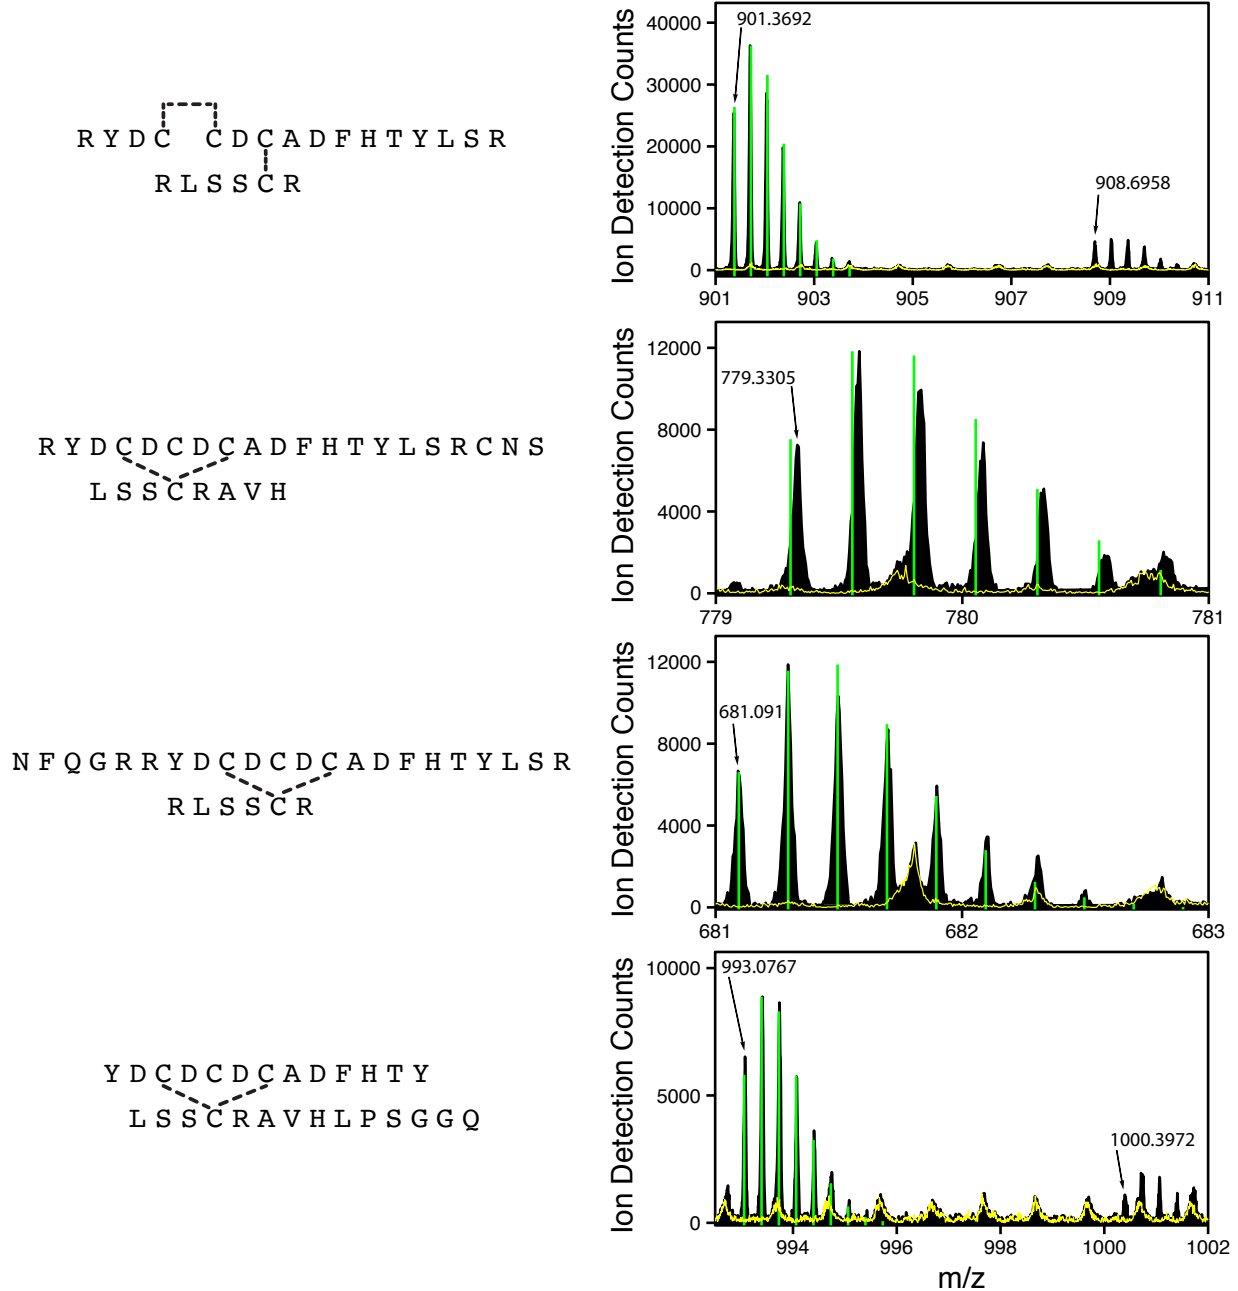

Figure S12: Digested fragments containing an intramolecular disulfide bond were identified by their disappearance following the addition of DTT. The peptide trace without DTT is colored black and the peptide trace with DTT is colored yellow. The predicted isotope pattern for the fragment is shown as green bars. Secondary fragmentation was not sufficient to confirm the location of the intramolecular disulfides were between peptides. The  $\text{Na}^+$ -bound versions of fragments 1 and 4 were also observed and are shown in the respective traces.

Table S2: Cysteine content of human  $\alpha$ -,  $\beta$ -, and  $\gamma$ -crystallins

| Protein     | No. Residues | No. Cysteines | Percentage Cysteine | UniProt ID  |
|-------------|--------------|---------------|---------------------|-------------|
| $\alpha$ A  | 173          | 2             | 1.16%               | CRYAA_HUMAN |
| $\alpha$ B  | 175          | 0             | 0.00%               | CRYAB_HUMAN |
| $\beta$ A1* | 198          | 5             | 2.53%               | CRBA1_HUMAN |
| $\beta$ A2  | 197          | 6             | 3.05%               | CRBA2_HUMAN |
| $\beta$ A3  | 215          | 5             | 2.33%               | CRBA1_HUMAN |
| $\beta$ A4  | 196          | 5             | 2.55%               | CRBA4_HUMAN |
| $\beta$ B1  | 252          | 1             | 0.40%               | CRBB1_HUMAN |
| $\beta$ B2  | 205          | 2             | 0.98%               | CRBB2_HUMAN |
| $\beta$ B3  | 211          | 2             | 0.95%               | CRBB3_HUMAN |
| $\gamma$ A  | 174          | 9             | 5.17%               | CRGA_HUMAN  |
| $\gamma$ B  | 175          | 7             | 4.00%               | CRGB_HUMAN  |
| $\gamma$ C  | 174          | 8             | 4.60%               | CRGC_HUMAN  |
| $\gamma$ D  | 174          | 6             | 3.45%               | CRGD_HUMAN  |
| $\gamma$ S  | 178          | 7             | 3.93%               | CRGS_HUMAN  |

\*Note:  $\beta$ A1 is an isoform of  $\beta$ A3 generated via an alternate translation initiation site

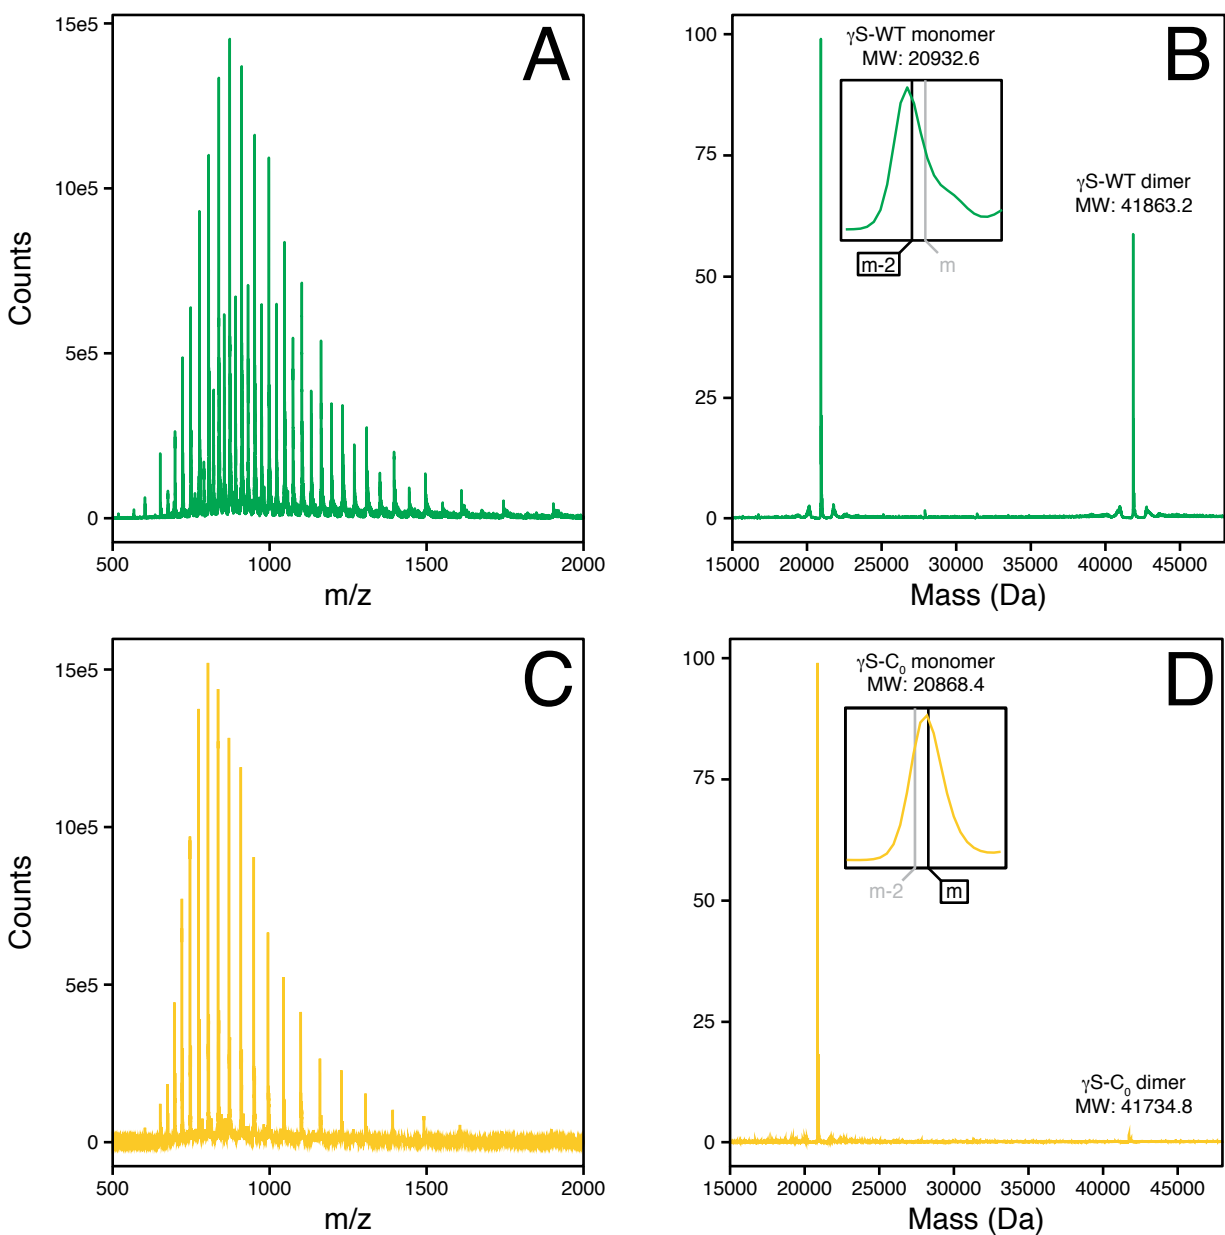

Figure S13: The mass spectra and reconstructed masses for soluble fractions of  $\gamma$ S-WT (A, B) and  $\gamma$ S-C<sub>0</sub> (C,D) following incubation with 2 equivalents of Cu<sup>2+</sup>. Dimeric species are evidenced as a doubly-charged species in the raw mass spectrum of  $\gamma$ S-WT and the resulting mass reconstruction. In contrast, minimal levels of dimer are observed for  $\gamma$ S-C<sub>0</sub>. The expected monomeric and dimeric molecular weights are shown for  $\gamma$ S-WT and  $\gamma$ S-C<sub>0</sub> in panels C and D. The dimer masses assume a singular intermolecular disulfide bond. Inset images show the mass reconstruction for the monomeric peak. The observed mass for  $\gamma$ S-WT is consistent with an m-2 species, while the mass of the  $\gamma$ S-C<sub>0</sub> peak is consistent with the expected mass (m).

## References

- (1) Brubaker, W. D., and Martin, R. W. (2012) 1 H, 13 C, and 15 N assignments of wild-type human  $\gamma$ S-crystallin and its cataract-related variant  $\gamma$ S-G18V. *Biomol. NMR Assign.* 6, 63–67.
- (2) Lu, C.-H., Lin, Y.-F., Lin, J.-J., and Yu, C.-S. (2012) Prediction of metal ion-binding sites in proteins using the fragment transformation method. *PloS One* 7, e39252.
- (3) Lin, Y.-F., Cheng, C.-W., Shih, C.-S., Hwang, J.-K., Yu, C.-S., and Lu, C.-H. (2016) MIB: metal ion-binding site prediction and docking server. *J. Chem. Inf. Model.* 56, 2287–2291.
